# Supplementary material for: A selective fluorescent probe based on citrate doped polypyrrole for dual determination of VO2+/Fe3+ in biological samples
Source: Royal Society of Chemistry journal article supplement (doi:10.1039/d1nj05376k), 2021-12-15
Supplement: d1nj05376k1.pdf [file d1nj05376k1.pdf]

## A selective fluorescent probe based on citrate doped polypyrrole for dual determination of $\text{VO}^{2+}/\text{Fe}^{3+}$ in biological samples

Taraneh Kajinehbaf<sup>a</sup> and Naader Alizadeh<sup>a,b,\*</sup>

<sup>a</sup> Department of Chemistry, Faculty of Basic Sciences, Tarbiat Modares University, P.O. Box 14115-175, Tehran, Iran

<sup>b</sup> Faculty of Interdisciplinary Science and Technology, Tarbiat Modares University, Tehran, Iran

**\*Corresponding author**

E-mail: [alizaden@modares.ac.ir](mailto:alizaden@modares.ac.ir)

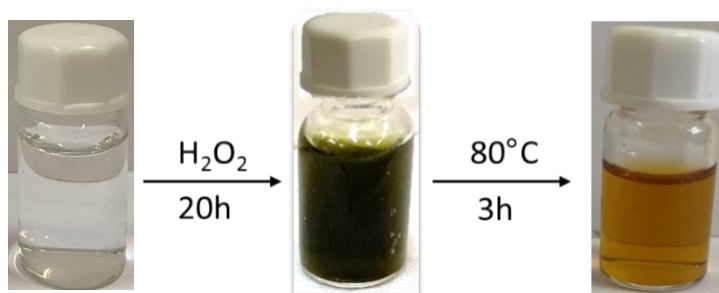

Fig. S1. Synthesis procedure of water-soluble PPy-Cit conjugated polymer

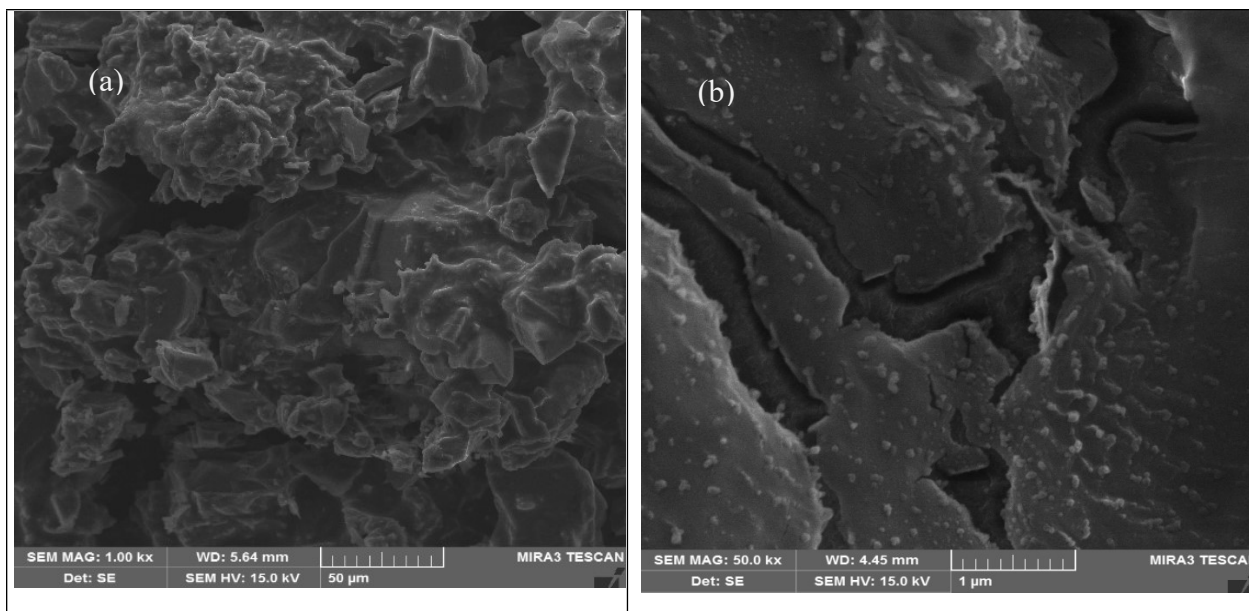

Fig. S2. SEM image of PPy-Cit polymer in 1000 (a) and 50000 (b) magnifications.

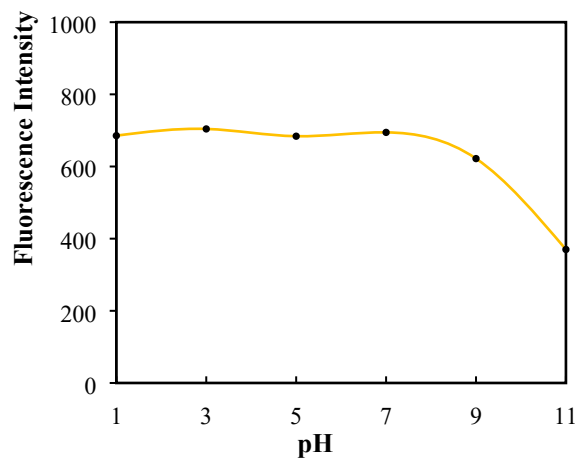

Fig. S3. Fluorescence intensity of 250 times diluted PPy-Cit solution in different pH, excitation wavelength = 395 nm and emission wavelength = 460 nm.

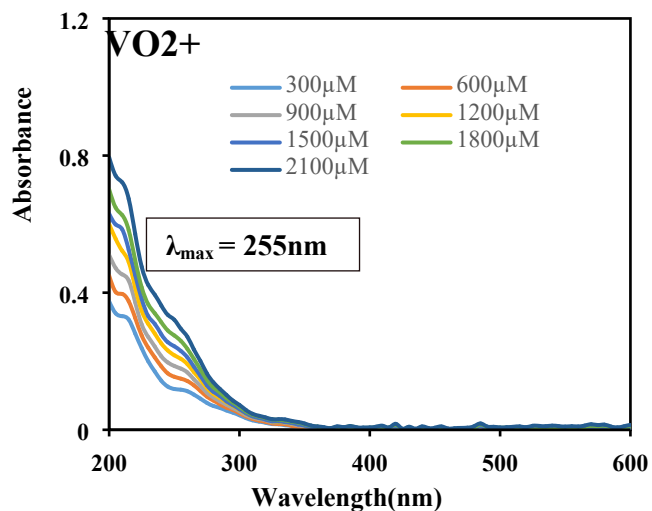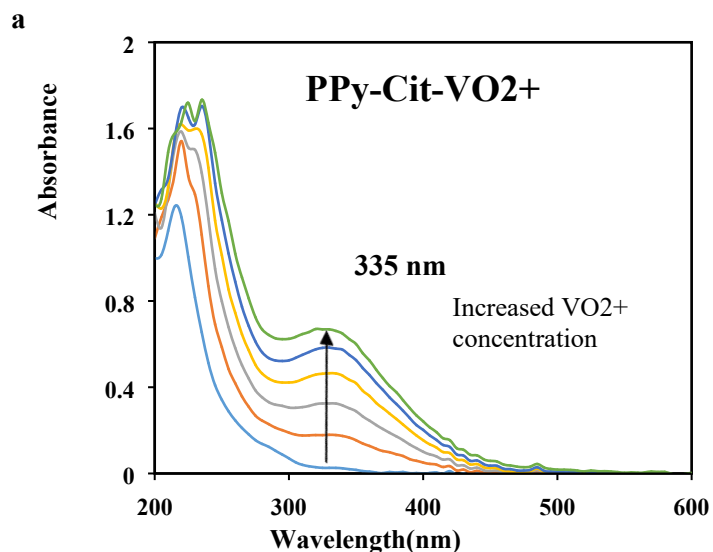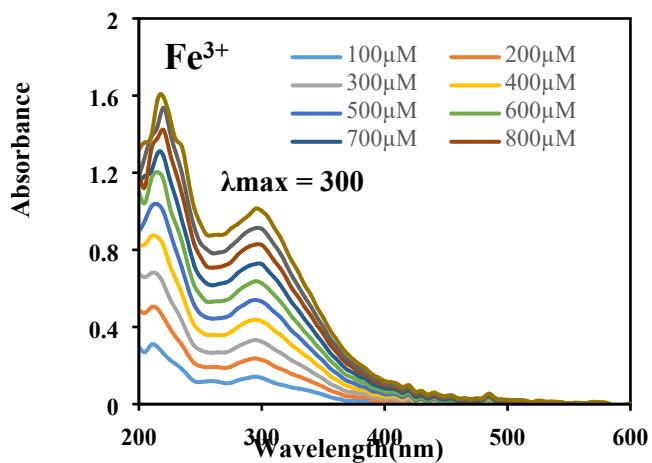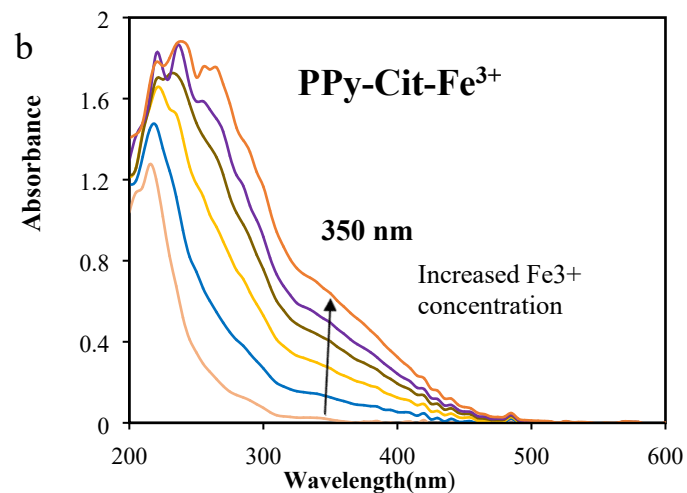

Fig. S4. UV-vis spectrum of the added ions at different concentrations and PPy-Cit in presence of added ions, a:  $\text{VO}_2^+$  (0, 250, 500, 750, 1000, 1250  $\mu\text{M}$ ); b:  $\text{Fe}^{3+}$  (0, 150, 250, 350, 450 and 550  $\mu\text{M}$ ).

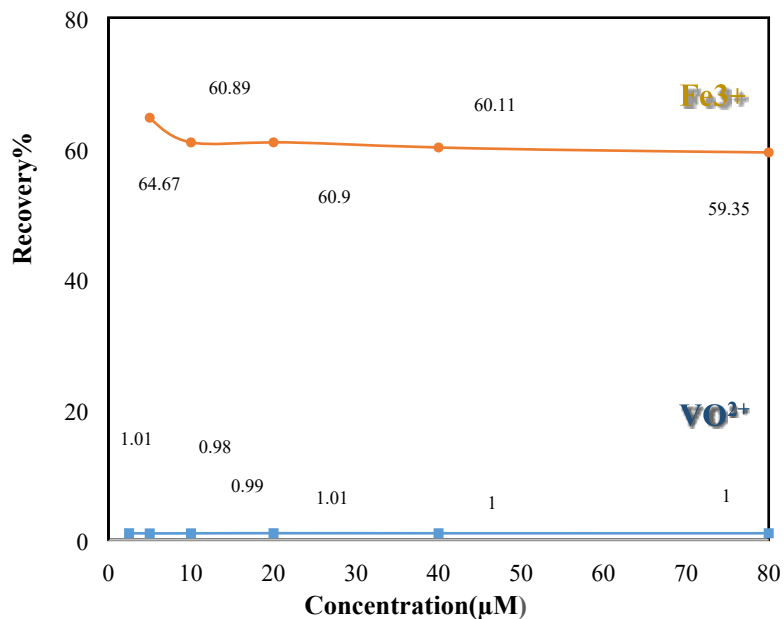

Fig. S5. Fluorescence intensity recovery percent, after adding EDTA (100 μM) to PPy-Cit-VO<sup>2+</sup> (lower curve) and PPy-Cit-Fe<sup>3+</sup> (upper curve) system.

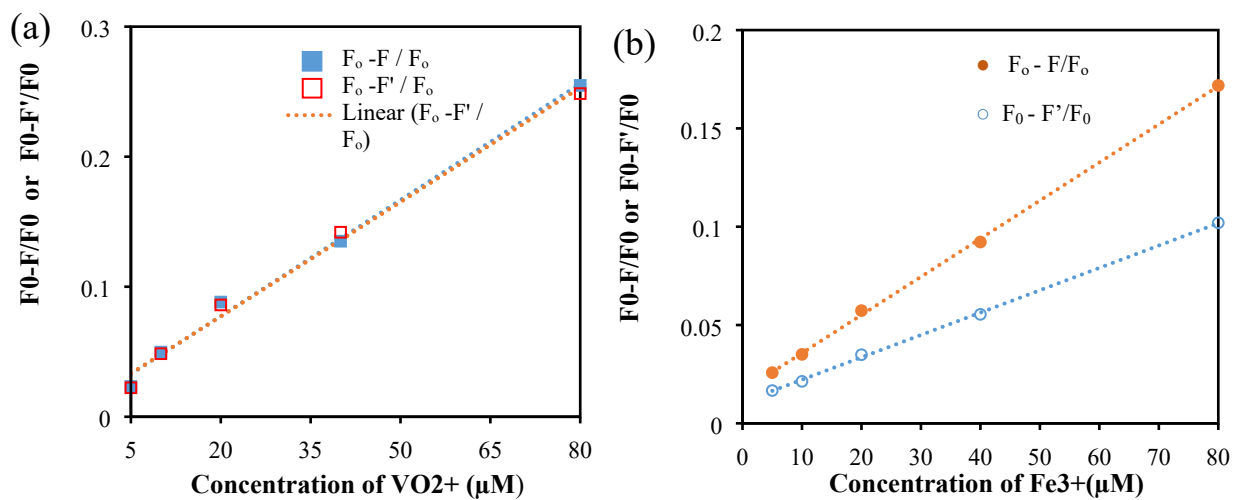

Fig. S6. Calibration curve before (solid symbol) and after (hollow symbol) adding EDTA (equal concentration of EDTA to VO<sup>2+</sup> and Fe<sup>3+</sup> concentration) to PPy-Cit-VO<sup>2+</sup> system (a), and PPy-Cit-Fe<sup>3+</sup> system (b); where F and F' are fluorescence intensity before and after adding EDTA to PPy-Cit-VO<sup>2+</sup> and PPy-Cit-Fe<sup>3+</sup>, respectively.

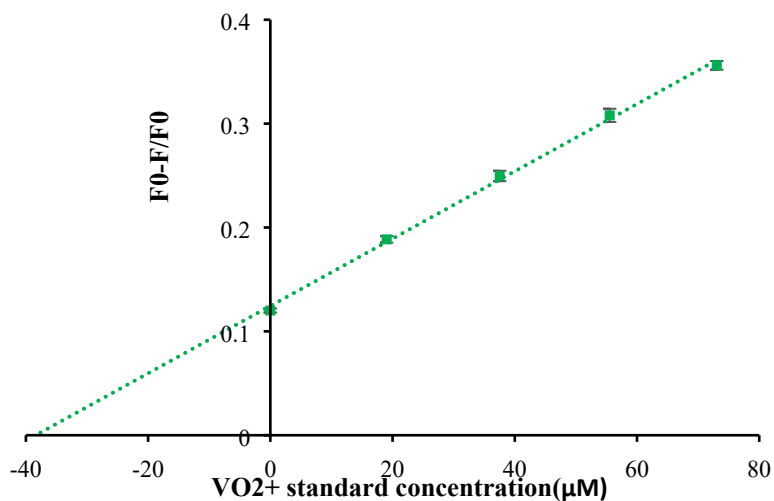

Fig. S7. Standard addition method for analysis of VO<sup>2+</sup> in vanadyl sulfate tablet (addition of 0, 25.6, 50.9, 75.9 and 100.5 μM). The error bars represent the triplicate measurements.

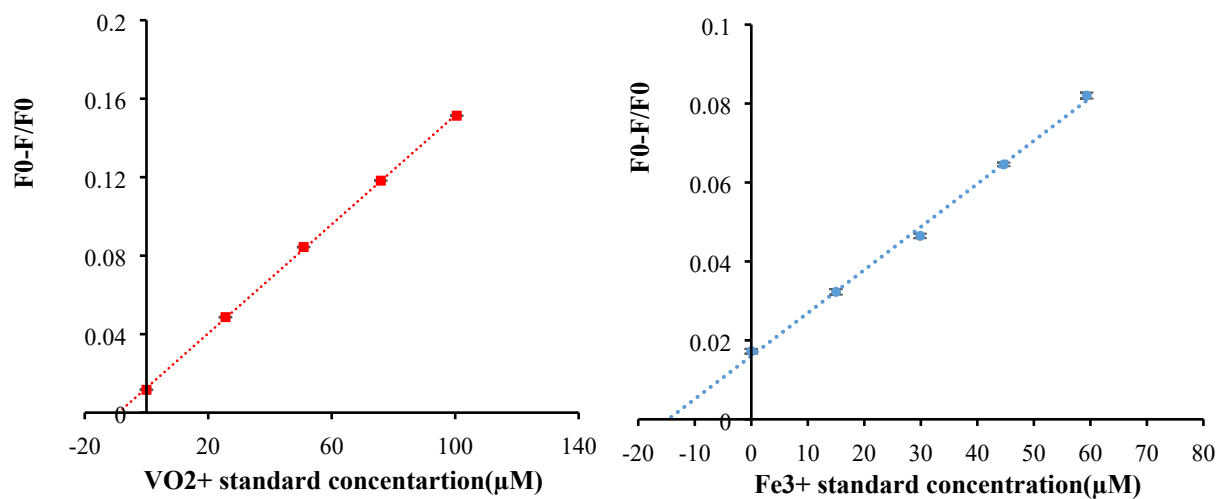

Fig. S8. Standard addition method for analysis of VO<sup>2+</sup> in serum 2 (addition of 0, 25.6, 50.9, 75.9 and 100.5 μM) (A) and Fe<sup>3+</sup> in 30μM spiked serum 6 (B) (addition of 0, 15, 22.7, 44.7 and 59.3μM)

**Table S1.** Relative response ( $F_0-F/F_0$ ) of PPy-Cit sensor to different concentrations of  $VO^{2+}$  in the presence of  $Fe^{3+}$  ions at various delay times.

| Concentration ( $\mu M$ ) |           | % Quenching after |        | Measurement ( $\mu M$ )         |                        | Recovery % |           |
|---------------------------|-----------|-------------------|--------|---------------------------------|------------------------|------------|-----------|
| $VO^{2+}$                 | $Fe^{3+}$ | 0.5 min           | 20 min | $VO^{2+}$ after 0.5 min         | $Fe^{3+}$ after 20 min | $VO^{2+}$  | $Fe^{3+}$ |
| 5                         | 5         | 3.1               | 5.6    | 5.23 ( $\pm .11$ ) <sup>a</sup> | 5.65 ( $\pm .01$ )     | 104.6      | 113       |
| 10                        | 20        | 4.6               | 12.6   | 10.18 ( $\pm .09$ )             | 19.06 ( $\pm .05$ )    | 101.8      | 95.5      |
| 20                        | 40        | 7.7               | 24     | 20.57( $\pm .04$ )              | 39.98( $\pm .1$ )      | 102.9      | 100.0     |

<sup>a</sup> Standard deviation for three replicate
